# Supplementary material
Source: publisher site journal article supplement (https://www.spandidos-publications.com/2635/downloadSupplementary)
Supplement: Supplementary file 1 [file downloadSupplementary]

## Sheet: Table S11 Ras_KEGG_pathway_iden
Table SXI. Ras_KEGG_pathway_iden.
#Term	Database	ID	Input number	Background number	P-value	Corrected P-value	Input	Hyperlink
Oocyte meiosis	KEGG PATHWAY	hsa04114	9	112	0.00246169	0.419964	YWHAZ|IGF1R|STAG3|CAMK2G|AR|AURKA|MAPK12|PRKACB|PPP3CC	http://www.genome.jp/kegg-bin/show_pathway?hsa04114/hsa:818%09red/hsa:5533%09red/hsa:7534%09red/hsa:3480%09red/hsa:5567%09red/hsa:367%09red/hsa:6790%09red/hsa:10734%09red/hsa:6300%09red
Folate biosynthesis	KEGG PATHWAY	hsa00790	3	14	0.00511132	0.419964	DHFR|MOCS2|PTS	http://www.genome.jp/kegg-bin/show_pathway?hsa00790/hsa:1719%09red/hsa:5805%09red/hsa:4338%09red
Glycosphingolipid biosynthesis - ganglio series	KEGG PATHWAY	hsa00604	3	15	0.00626812	0.419964	ST6GALNAC6|B4GALNT1|GLB1	http://www.genome.jp/kegg-bin/show_pathway?hsa00604/hsa:2720%09red/hsa:2583%09red/hsa:30815%09red
Other glycan degradation	KEGG PATHWAY	hsa00511	3	18	0.0106161	0.533459	MAN2B2|GLB1|ENGASE	http://www.genome.jp/kegg-bin/show_pathway?hsa00511/hsa:2720%09red/hsa:23324%09red/hsa:64772%09red
MAPK signaling pathway	KEGG PATHWAY	hsa04010	13	260	0.017765	0.655692	MAP4K3|MAP4K2|MAPT|ATF2|NR4A1|GRB2|NFATC3|MAPK12|PRKACB|FGFR4|PPP3CC|RAF1|FGFR1	http://www.genome.jp/kegg-bin/show_pathway?hsa04010/hsa:2264%09red/hsa:5533%09red/hsa:8491%09red/hsa:2885%09red/hsa:3164%09red/hsa:5567%09red/hsa:2260%09red/hsa:4137%09red/hsa:4775%09red/hsa:1386%09red/hsa:5894%09red/hsa:6300%09red/hsa:5871%09red
Ether lipid metabolism	KEGG PATHWAY	hsa00565	4	42	0.0230243	0.655692	PLA2G6|PAFAH1B2|EPT1|PLD3	http://www.genome.jp/kegg-bin/show_pathway?hsa00565/hsa:23646%09red/hsa:85465%09red/hsa:5049%09red/hsa:8398%09red
Prostate cancer	KEGG PATHWAY	hsa05215	6	89	0.028042	0.655692	IGF1R|TCF7L2|GRB2|RAF1|AR|FGFR1	http://www.genome.jp/kegg-bin/show_pathway?hsa05215/hsa:2885%09red/hsa:3480%09red/hsa:367%09red/hsa:2260%09red/hsa:5894%09red/hsa:6934%09red
mRNA surveillance pathway	KEGG PATHWAY	hsa03015	6	92	0.0323084	0.655692	SMG6|PABPC1L|PABPC4|CPSF4|MAGOH|RNMT	http://www.genome.jp/kegg-bin/show_pathway?hsa03015/hsa:8761%09red/hsa:80336%09red/hsa:10898%09red/hsa:4116%09red/hsa:8731%09red/hsa:23293%09red
Amphetamine addiction	KEGG PATHWAY	hsa05031	5	70	0.0351111	0.655692	PRKACB|CAMK2G|ATF2|GRIN3B|PPP3CC	http://www.genome.jp/kegg-bin/show_pathway?hsa05031/hsa:116444%09red/hsa:5567%09red/hsa:1386%09red/hsa:5533%09red/hsa:818%09red
Homologous recombination	KEGG PATHWAY	hsa03440	3	28	0.0352771	0.655692	POLD4|RAD51B|TOP3B	http://www.genome.jp/kegg-bin/show_pathway?hsa03440/hsa:57804%09red/hsa:5890%09red/hsa:8940%09red
RNA degradation	KEGG PATHWAY	hsa03018	5	72	0.0389611	0.655692	DCP2|PABPC4|PABPC1L|EDC4|CNOT4	http://www.genome.jp/kegg-bin/show_pathway?hsa03018/hsa:4850%09red/hsa:23644%09red/hsa:167227%09red/hsa:8761%09red/hsa:80336%09red
Ovarian steroidogenesis	KEGG PATHWAY	hsa04913	4	51	0.0429977	0.655692	IGF1R|CYP11A1|GDF9|PRKACB	http://www.genome.jp/kegg-bin/show_pathway?hsa04913/hsa:5567%09red/hsa:3480%09red/hsa:1583%09red/hsa:2661%09red
B cell receptor signaling pathway	KEGG PATHWAY	hsa04662	5	74	0.0430594	0.655692	GRB2|IFITM1|PPP3CC|RAF1|NFATC3	http://www.genome.jp/kegg-bin/show_pathway?hsa04662/hsa:2885%09red/hsa:5894%09red/hsa:8519%09red/hsa:5533%09red/hsa:4775%09red
Endometrial cancer	KEGG PATHWAY	hsa05213	4	52	0.0456701	0.655692	GRB2|RAF1|AXIN2|TCF7L2	http://www.genome.jp/kegg-bin/show_pathway?hsa05213/hsa:2885%09red/hsa:5894%09red/hsa:6934%09red/hsa:8313%09red
Base excision repair	KEGG PATHWAY	hsa03410	3	33	0.0535037	0.679228	MUTYH|POLD4|LIG3	http://www.genome.jp/kegg-bin/show_pathway?hsa03410/hsa:4595%09red/hsa:3980%09red/hsa:57804%09red
Acute myeloid leukemia	KEGG PATHWAY	hsa05221	4	57	0.0603901	0.679228	PML|GRB2|RAF1|TCF7L2	http://www.genome.jp/kegg-bin/show_pathway?hsa05221/hsa:2885%09red/hsa:5371%09red/hsa:6934%09red/hsa:5894%09red
Ubiquitin mediated proteolysis	KEGG PATHWAY	hsa04120	7	138	0.0680483	0.679228	WWP2|FZR1|HERC1|NEDD4L|FBXO4|HERC4|PML	http://www.genome.jp/kegg-bin/show_pathway?hsa04120/hsa:11060%09red/hsa:26091%09red/hsa:5371%09red/hsa:8925%09red/hsa:26272%09red/hsa:51343%09red/hsa:23327%09red
Proteoglycans in cancer	KEGG PATHWAY	hsa05205	10	225	0.0684669	0.679228	ERBB3|IGF1R|CAMK2G|SMAD2|GRB2|PPP1R12A|MAPK12|PRKACB|RAF1|FGFR1	http://www.genome.jp/kegg-bin/show_pathway?hsa05205/hsa:4659%09red/hsa:818%09red/hsa:2885%09red/hsa:3480%09red/hsa:5567%09red/hsa:2065%09red/hsa:2260%09red/hsa:4087%09red/hsa:5894%09red/hsa:6300%09red
Progesterone-mediated oocyte maturation	KEGG PATHWAY	hsa04914	5	86	0.0729347	0.679228	IGF1R|FZR1|RAF1|MAPK12|PRKACB	http://www.genome.jp/kegg-bin/show_pathway?hsa04914/hsa:5567%09red/hsa:5894%09red/hsa:3480%09red/hsa:51343%09red/hsa:6300%09red
Wnt signaling pathway	KEGG PATHWAY	hsa04310	7	141	0.0745002	0.679228	NFATC3|AXIN2|CAMK2G|TCF7L2|CSNK1E|PRKACB|PPP3CC	http://www.genome.jp/kegg-bin/show_pathway?hsa04310/hsa:818%09red/hsa:5533%09red/hsa:4775%09red/hsa:5567%09red/hsa:1454%09red/hsa:6934%09red/hsa:8313%09red
Insulin secretion	KEGG PATHWAY	hsa04911	5	87	0.0758322	0.679228	TRPM4|KCNN4|CAMK2G|ATF2|PRKACB	http://www.genome.jp/kegg-bin/show_pathway?hsa04911/hsa:1386%09red/hsa:5567%09red/hsa:3783%09red/hsa:818%09red/hsa:54795%09red
Colorectal cancer	KEGG PATHWAY	hsa05210	4	62	0.0773298	0.679228	RAF1|AXIN2|SMAD2|TCF7L2	http://www.genome.jp/kegg-bin/show_pathway?hsa05210/hsa:4087%09red/hsa:5894%09red/hsa:6934%09red/hsa:8313%09red
Endocytosis	KEGG PATHWAY	hsa04144	9	203	0.0824014	0.679228	ERBB3|IGF1R|ARAP1|AGAP1|SMAD2|NEDD4L|PML|FGFR4|SH3GL2	http://www.genome.jp/kegg-bin/show_pathway?hsa04144/hsa:116985%09red/hsa:116987%09red/hsa:5371%09red/hsa:3480%09red/hsa:2264%09red/hsa:2065%09red/hsa:4087%09red/hsa:6456%09red/hsa:23327%09red
HTLV-I infection	KEGG PATHWAY	hsa05166	11	264	0.082825	0.679228	PPP3CC|ATF2|TBP|SMAD2|NFATC3|POLD4|CREM|PRKACB|TERT|IL15RA|CHEK1	http://www.genome.jp/kegg-bin/show_pathway?hsa05166/hsa:3601%09red/hsa:1390%09red/hsa:5533%09red/hsa:1111%09red/hsa:1386%09red/hsa:4087%09red/hsa:4775%09red/hsa:5567%09red/hsa:57804%09red/hsa:6908%09red/hsa:7015%09red
Glycosaminoglycan degradation	KEGG PATHWAY	hsa00531	2	19	0.0863252	0.679228	ARSB|GLB1	http://www.genome.jp/kegg-bin/show_pathway?hsa00531/hsa:2720%09red/hsa:411%09red
Glioma	KEGG PATHWAY	hsa05214	4	65	0.0885201	0.679228	GRB2|IGF1R|CAMK2G|RAF1	http://www.genome.jp/kegg-bin/show_pathway?hsa05214/hsa:2885%09red/hsa:5894%09red/hsa:3480%09red/hsa:818%09red
GnRH signaling pathway	KEGG PATHWAY	hsa04912	5	92	0.0912395	0.679228	GRB2|CAMK2G|RAF1|MAPK12|PRKACB	http://www.genome.jp/kegg-bin/show_pathway?hsa04912/hsa:5567%09red/hsa:5894%09red/hsa:6300%09red/hsa:818%09red/hsa:2885%09red
Epithelial cell signaling in Helicobacter pylori infection	KEGG PATHWAY	hsa05120	4	68	0.100446	0.721062	ATP6V0B|NOD1|CSK|MAPK12	http://www.genome.jp/kegg-bin/show_pathway?hsa05120/hsa:1445%09red/hsa:533%09red/hsa:6300%09red/hsa:10392%09red
Long-term potentiation	KEGG PATHWAY	hsa04720	4	69	0.10458	0.724847	PRKACB|CAMK2G|RAF1|PPP3CC	http://www.genome.jp/kegg-bin/show_pathway?hsa04720/hsa:5567%09red/hsa:5894%09red/hsa:5533%09red/hsa:818%09red
Axon guidance	KEGG PATHWAY	hsa04360	6	129	0.119599	0.746096	NFATC3|LIMK2|SEMA6D|PPP3CC|SEMA4D|SEMA4F	http://www.genome.jp/kegg-bin/show_pathway?hsa04360/hsa:5533%09red/hsa:4775%09red/hsa:3985%09red/hsa:10507%09red/hsa:10505%09red/hsa:80031%09red
Adherens junction	KEGG PATHWAY	hsa04520	4	73	0.121868	0.746096	IGF1R|TCF7L2|SMAD2|FGFR1	http://www.genome.jp/kegg-bin/show_pathway?hsa04520/hsa:4087%09red/hsa:3480%09red/hsa:2260%09red/hsa:6934%09red
Glycosaminoglycan biosynthesis - heparan sulfate / heparin	KEGG PATHWAY	hsa00534	2	24	0.128234	0.746096	NDST2|HS6ST2	http://www.genome.jp/kegg-bin/show_pathway?hsa00534/hsa:90161%09red/hsa:8509%09red
Endocrine and other factor-regulated calcium reabsorption	KEGG PATHWAY	hsa04961	3	48	0.128621	0.746096	PTH1R|VDR|PRKACB	http://www.genome.jp/kegg-bin/show_pathway?hsa04961/hsa:5567%09red/hsa:7421%09red/hsa:5745%09red
Notch signaling pathway	KEGG PATHWAY	hsa04330	3	48	0.128621	0.746096	APH1A|SNW1|NUMB	http://www.genome.jp/kegg-bin/show_pathway?hsa04330/hsa:8650%09red/hsa:22938%09red/hsa:51107%09red
RNA transport	KEGG PATHWAY	hsa03013	7	164	0.135399	0.746096	SMN2|PABPC1L|PABPC4|EIF5|EIF3F|MAGOH|THOC5	http://www.genome.jp/kegg-bin/show_pathway?hsa03013/hsa:6607%09red/hsa:8563%09red/hsa:8665%09red/hsa:1983%09red/hsa:80336%09red/hsa:8761%09red/hsa:4116%09red
Pyrimidine metabolism	KEGG PATHWAY	hsa00240	5	105	0.13809	0.746096	ENTPD6|TYMP|DCTD|POLD4|TXNRD1	http://www.genome.jp/kegg-bin/show_pathway?hsa00240/hsa:7296%09red/hsa:955%09red/hsa:1635%09red/hsa:1890%09red/hsa:57804%09red
Cocaine addiction	KEGG PATHWAY	hsa05030	3	50	0.140543	0.746096	GRIN3B|ATF2|PRKACB	http://www.genome.jp/kegg-bin/show_pathway?hsa05030/hsa:116444%09red/hsa:5567%09red/hsa:1386%09red
T cell receptor signaling pathway	KEGG PATHWAY	hsa04660	5	106	0.14207	0.746096	GRB2|PPP3CC|RAF1|MAPK12|NFATC3	http://www.genome.jp/kegg-bin/show_pathway?hsa04660/hsa:2885%09red/hsa:5894%09red/hsa:6300%09red/hsa:5533%09red/hsa:4775%09red
Protein processing in endoplasmic reticulum	KEGG PATHWAY	hsa04141	7	167	0.144765	0.746096	HSPH1|HYOU1|MOGS|SSR4|SAR1A|SEC31B|SEC31A	http://www.genome.jp/kegg-bin/show_pathway?hsa04141/hsa:22872%09red/hsa:56681%09red/hsa:6748%09red/hsa:25956%09red/hsa:10525%09red/hsa:10808%09red/hsa:7841%09red
Insulin signaling pathway	KEGG PATHWAY	hsa04910	6	142	0.165009	0.781503	PPP1R3F|PRKAA2|GRB2|RAPGEF1|PRKACB|RAF1	http://www.genome.jp/kegg-bin/show_pathway?hsa04910/hsa:2889%09red/hsa:2885%09red/hsa:5567%09red/hsa:5563%09red/hsa:89801%09red/hsa:5894%09red
Vibrio cholerae infection	KEGG PATHWAY	hsa05110	3	54	0.165426	0.781503	ATP6V0B|TJP2|PRKACB	http://www.genome.jp/kegg-bin/show_pathway?hsa05110/hsa:5567%09red/hsa:533%09red/hsa:9414%09red
Fanconi anemia pathway	KEGG PATHWAY	hsa03460	3	54	0.165426	0.781503	REV1|REV3L|TOP3B	http://www.genome.jp/kegg-bin/show_pathway?hsa03460/hsa:5980%09red/hsa:51455%09red/hsa:8940%09red
Chemical carcinogenesis	KEGG PATHWAY	hsa05204	4	83	0.169838	0.781503	SULT1A4|CYP3A5|GSTT2B|GSTM1	http://www.genome.jp/kegg-bin/show_pathway?hsa05204/hsa:653689%09red/hsa:1577%09red/hsa:2944%09red/hsa:445329%09red
Viral carcinogenesis	KEGG PATHWAY	hsa05203	8	207	0.171448	0.781503	YWHAZ|SNW1|TBP|GTF2H1|GRB2|PRKACB|ATF2|CHEK1	http://www.genome.jp/kegg-bin/show_pathway?hsa05203/hsa:1111%09red/hsa:22938%09red/hsa:1386%09red/hsa:2885%09red/hsa:7534%09red/hsa:2965%09red/hsa:5567%09red/hsa:6908%09red
Hypertrophic cardiomyopathy (HCM)	KEGG PATHWAY	hsa05410	4	84	0.174963	0.781503	PRKAA2|TTN|TPM1|DAG1	http://www.genome.jp/kegg-bin/show_pathway?hsa05410/hsa:7168%09red/hsa:5563%09red/hsa:1605%09red/hsa:7273%09red
PI3K-Akt signaling pathway	KEGG PATHWAY	hsa04151	12	346	0.189993	0.789949	YWHAZ|IGF1R|SGK1|ATF2|NR4A1|PRKAA2|COL4A5|GRB2|FGFR4|MLST8|RAF1|FGFR1	http://www.genome.jp/kegg-bin/show_pathway?hsa04151/hsa:1287%09red/hsa:2264%09red/hsa:7534%09red/hsa:1386%09red/hsa:2885%09red/hsa:3480%09red/hsa:3164%09red/hsa:2260%09red/hsa:5563%09red/hsa:64223%09red/hsa:5894%09red/hsa:6446%09red
Circadian rhythm	KEGG PATHWAY	hsa04710	2	31	0.192661	0.789949	CSNK1E|PRKAA2	http://www.genome.jp/kegg-bin/show_pathway?hsa04710/hsa:5563%09red/hsa:1454%09red
ErbB signaling pathway	KEGG PATHWAY	hsa04012	4	88	0.195977	0.789949	GRB2|CAMK2G|RAF1|ERBB3	http://www.genome.jp/kegg-bin/show_pathway?hsa04012/hsa:2885%09red/hsa:5894%09red/hsa:2065%09red/hsa:818%09red
Neurotrophin signaling pathway	KEGG PATHWAY	hsa04722	5	120	0.2026	0.789949	GRB2|CAMK2G|RAF1|RAPGEF1|MAPK12	http://www.genome.jp/kegg-bin/show_pathway?hsa04722/hsa:2885%09red/hsa:5894%09red/hsa:6300%09red/hsa:2889%09red/hsa:818%09red
mTOR signaling pathway	KEGG PATHWAY	hsa04150	3	60	0.204898	0.789949	MLST8|CAB39|PRKAA2	http://www.genome.jp/kegg-bin/show_pathway?hsa04150/hsa:64223%09red/hsa:51719%09red/hsa:5563%09red
Synthesis and degradation of ketone bodies	KEGG PATHWAY	hsa00072	1	9	0.211479	0.789949	HMGCL	http://www.genome.jp/kegg-bin/show_pathway?hsa00072/hsa:3155%09red
Linoleic acid metabolism	KEGG PATHWAY	hsa00591	2	33	0.211795	0.789949	PLA2G6|CYP3A5	http://www.genome.jp/kegg-bin/show_pathway?hsa00591/hsa:1577%09red/hsa:8398%09red
Dilated cardiomyopathy	KEGG PATHWAY	hsa05414	4	91	0.212225	0.789949	DAG1|TTN|TPM1|PRKACB	http://www.genome.jp/kegg-bin/show_pathway?hsa05414/hsa:7168%09red/hsa:5567%09red/hsa:1605%09red/hsa:7273%09red
Glycerophospholipid metabolism	KEGG PATHWAY	hsa00564	4	91	0.212225	0.789949	PLA2G6|DGKA|EPT1|PLD3	http://www.genome.jp/kegg-bin/show_pathway?hsa00564/hsa:23646%09red/hsa:85465%09red/hsa:1606%09red/hsa:8398%09red
Hippo signaling pathway	KEGG PATHWAY	hsa04390	6	156	0.220802	0.80693	YWHAZ|AXIN2|ID2|SMAD2|CSNK1E|TCF7L2	http://www.genome.jp/kegg-bin/show_pathway?hsa04390/hsa:7534%09red/hsa:3398%09red/hsa:1454%09red/hsa:4087%09red/hsa:6934%09red/hsa:8313%09red
VEGF signaling pathway	KEGG PATHWAY	hsa04370	3	63	0.225389	0.808984	PPP3CC|RAF1|MAPK12	http://www.genome.jp/kegg-bin/show_pathway?hsa04370/hsa:5894%09red/hsa:6300%09red/hsa:5533%09red
Sulfur relay system	KEGG PATHWAY	hsa04122	1	10	0.232039	0.818244	MOCS2	http://www.genome.jp/kegg-bin/show_pathway?hsa04122/hsa:4338%09red
Renal cell carcinoma	KEGG PATHWAY	hsa05211	3	66	0.246258	0.841696	GRB2|RAF1|RAPGEF1	http://www.genome.jp/kegg-bin/show_pathway?hsa05211/hsa:2885%09red/hsa:5894%09red/hsa:2889%09red
Dopaminergic synapse	KEGG PATHWAY	hsa04728	5	131	0.255242	0.841696	PRKACB|CAMK2G|ATF2|MAPK12|PPP3CC	http://www.genome.jp/kegg-bin/show_pathway?hsa04728/hsa:1386%09red/hsa:5567%09red/hsa:6300%09red/hsa:5533%09red/hsa:818%09red
Bladder cancer	KEGG PATHWAY	hsa05219	2	38	0.260252	0.841696	TYMP|RAF1	http://www.genome.jp/kegg-bin/show_pathway?hsa05219/hsa:5894%09red/hsa:1890%09red
Estrogen signaling pathway	KEGG PATHWAY	hsa04915	4	100	0.262966	0.841696	GRB2|RAF1|ATF2|PRKACB	http://www.genome.jp/kegg-bin/show_pathway?hsa04915/hsa:1386%09red/hsa:5567%09red/hsa:5894%09red/hsa:2885%09red
Melanogenesis	KEGG PATHWAY	hsa04916	4	101	0.268751	0.841696	CAMK2G|RAF1|TCF7L2|PRKACB	http://www.genome.jp/kegg-bin/show_pathway?hsa04916/hsa:5567%09red/hsa:5894%09red/hsa:6934%09red/hsa:818%09red
Aldosterone-regulated sodium reabsorption	KEGG PATHWAY	hsa04960	2	39	0.269986	0.841696	NEDD4L|SGK1	http://www.genome.jp/kegg-bin/show_pathway?hsa04960/hsa:6446%09red/hsa:23327%09red
Fc epsilon RI signaling pathway	KEGG PATHWAY	hsa04664	3	70	0.274519	0.841696	GRB2|RAF1|MAPK12	http://www.genome.jp/kegg-bin/show_pathway?hsa04664/hsa:2885%09red/hsa:5894%09red/hsa:6300%09red
Melanoma	KEGG PATHWAY	hsa05218	3	71	0.281642	0.841696	IGF1R|RAF1|FGFR1	http://www.genome.jp/kegg-bin/show_pathway?hsa05218/hsa:5894%09red/hsa:3480%09red/hsa:2260%09red
RIG-I-like receptor signaling pathway	KEGG PATHWAY	hsa04622	3	71	0.281642	0.841696	TANK|NLRX1|MAPK12	http://www.genome.jp/kegg-bin/show_pathway?hsa04622/hsa:6300%09red/hsa:79671%09red/hsa:10010%09red
Natural killer cell mediated cytotoxicity	KEGG PATHWAY	hsa04650	5	137	0.285277	0.841696	GRB2|PPP3CC|RAF1|MICB|MICA	http://www.genome.jp/kegg-bin/show_pathway?hsa04650/hsa:2885%09red/hsa:5894%09red/hsa:100507436%09red/hsa:4277%09red/hsa:5533%09red
Prolactin signaling pathway	KEGG PATHWAY	hsa04917	3	72	0.288781	0.841696	GRB2|RAF1|MAPK12	http://www.genome.jp/kegg-bin/show_pathway?hsa04917/hsa:2885%09red/hsa:5894%09red/hsa:6300%09red
Drug metabolism - cytochrome P450	KEGG PATHWAY	hsa00982	3	74	0.303099	0.841696	GSTM1|CYP3A5|GSTT2B	http://www.genome.jp/kegg-bin/show_pathway?hsa00982/hsa:653689%09red/hsa:1577%09red/hsa:2944%09red
Influenza A	KEGG PATHWAY	hsa05164	6	176	0.309252	0.841696	NLRX1|MAPK12|PML|CPSF4|RAF1|ATF2	http://www.genome.jp/kegg-bin/show_pathway?hsa05164/hsa:1386%09red/hsa:5371%09red/hsa:10898%09red/hsa:5894%09red/hsa:6300%09red/hsa:79671%09red
Arrhythmogenic right ventricular cardiomyopathy (ARVC)	KEGG PATHWAY	hsa05412	3	75	0.310272	0.841696	DAG1|DSP|TCF7L2	http://www.genome.jp/kegg-bin/show_pathway?hsa05412/hsa:6934%09red/hsa:1832%09red/hsa:1605%09red
Fatty acid degradation	KEGG PATHWAY	hsa00071	2	44	0.318495	0.841696	ECI1|CPT1B	http://www.genome.jp/kegg-bin/show_pathway?hsa00071/hsa:1375%09red/hsa:1632%09red
Valine, leucine and isoleucine degradation	KEGG PATHWAY	hsa00280	2	44	0.318495	0.841696	HMGCL|MCEE	http://www.genome.jp/kegg-bin/show_pathway?hsa00280/hsa:3155%09red/hsa:84693%09red
Cardiac muscle contraction	KEGG PATHWAY	hsa04260	3	77	0.324633	0.841696	SLC9A6|UQCRB|TPM1	http://www.genome.jp/kegg-bin/show_pathway?hsa04260/hsa:7168%09red/hsa:7381%09red/hsa:10479%09red
Tuberculosis	KEGG PATHWAY	hsa05152	6	180	0.327723	0.841696	ATP6V0B|VDR|CAMK2G|MAPK12|PPP3CC|RAF1	http://www.genome.jp/kegg-bin/show_pathway?hsa05152/hsa:818%09red/hsa:5533%09red/hsa:533%09red/hsa:7421%09red/hsa:5894%09red/hsa:6300%09red
Basal transcription factors	KEGG PATHWAY	hsa03022	2	45	0.328124	0.841696	TBP|GTF2H1	http://www.genome.jp/kegg-bin/show_pathway?hsa03022/hsa:6908%09red/hsa:2965%09red
Hepatitis B	KEGG PATHWAY	hsa05161	5	147	0.336632	0.841696	YWHAZ|GRB2|RAF1|ATF2|NFATC3	http://www.genome.jp/kegg-bin/show_pathway?hsa05161/hsa:4775%09red/hsa:2885%09red/hsa:5894%09red/hsa:1386%09red/hsa:7534%09red
TGF-beta signaling pathway	KEGG PATHWAY	hsa04350	3	80	0.346174	0.841696	ACVR2A|ID2|SMAD2	http://www.genome.jp/kegg-bin/show_pathway?hsa04350/hsa:92%09red/hsa:4087%09red/hsa:3398%09red
Metabolism of xenobiotics by cytochrome P450	KEGG PATHWAY	hsa00980	3	80	0.346174	0.841696	GSTM1|CYP3A5|GSTT2B	http://www.genome.jp/kegg-bin/show_pathway?hsa00980/hsa:653689%09red/hsa:1577%09red/hsa:2944%09red
Pathways in cancer	KEGG PATHWAY	hsa05200	10	327	0.34633	0.841696	IGF1R|AXIN2|SMAD2|COL4A5|GRB2|TCF7L2|PML|RAF1|AR|FGFR1	http://www.genome.jp/kegg-bin/show_pathway?hsa05200/hsa:1287%09red/hsa:2885%09red/hsa:5371%09red/hsa:3480%09red/hsa:367%09red/hsa:2260%09red/hsa:4087%09red/hsa:5894%09red/hsa:6934%09red/hsa:8313%09red
Nucleotide excision repair	KEGG PATHWAY	hsa03420	2	47	0.347269	0.841696	GTF2H1|POLD4	http://www.genome.jp/kegg-bin/show_pathway?hsa03420/hsa:2965%09red/hsa:57804%09red
Peroxisome	KEGG PATHWAY	hsa04146	3	81	0.353344	0.841696	HMGCL|PEX13|PEX6	http://www.genome.jp/kegg-bin/show_pathway?hsa04146/hsa:3155%09red/hsa:5190%09red/hsa:5194%09red
Selenocompound metabolism	KEGG PATHWAY	hsa00450	1	17	0.361777	0.841696	TXNRD1	http://www.genome.jp/kegg-bin/show_pathway?hsa00450/hsa:7296%09red
N-Glycan biosynthesis	KEGG PATHWAY	hsa00510	2	49	0.366232	0.841696	MOGS|MAN2A2	http://www.genome.jp/kegg-bin/show_pathway?hsa00510/hsa:7841%09red/hsa:4122%09red
Steroid biosynthesis	KEGG PATHWAY	hsa00100	1	18	0.378438	0.841696	LSS	http://www.genome.jp/kegg-bin/show_pathway?hsa00100/hsa:4047%09red
Sulfur metabolism	KEGG PATHWAY	hsa00920	1	18	0.378438	0.841696	SULT1A4	http://www.genome.jp/kegg-bin/show_pathway?hsa00920/hsa:445329%09red
Mineral absorption	KEGG PATHWAY	hsa04978	2	51	0.384983	0.841696	VDR|SLC39A4	http://www.genome.jp/kegg-bin/show_pathway?hsa04978/hsa:7421%09red/hsa:55630%09red
Glutathione metabolism	KEGG PATHWAY	hsa00480	2	51	0.384983	0.841696	GSTM1|GSTT2B	http://www.genome.jp/kegg-bin/show_pathway?hsa00480/hsa:653689%09red/hsa:2944%09red
Hedgehog signaling pathway	KEGG PATHWAY	hsa04340	2	51	0.384983	0.841696	CSNK1E|PRKACB	http://www.genome.jp/kegg-bin/show_pathway?hsa04340/hsa:5567%09red/hsa:1454%09red
Drug metabolism - other enzymes	KEGG PATHWAY	hsa00983	2	51	0.384983	0.841696	TYMP|CYP3A5	http://www.genome.jp/kegg-bin/show_pathway?hsa00983/hsa:1577%09red/hsa:1890%09red
Vascular smooth muscle contraction	KEGG PATHWAY	hsa04270	4	121	0.38717	0.841696	PLA2G6|RAF1|PPP1R12A|PRKACB	http://www.genome.jp/kegg-bin/show_pathway?hsa04270/hsa:5567%09red/hsa:5894%09red/hsa:4659%09red/hsa:8398%09red
Lysosome	KEGG PATHWAY	hsa04142	4	122	0.393112	0.841696	ATP6V0B|PPT2|ARSB|GLB1	http://www.genome.jp/kegg-bin/show_pathway?hsa04142/hsa:2720%09red/hsa:533%09red/hsa:411%09red/hsa:9374%09red
Amyotrophic lateral sclerosis (ALS)	KEGG PATHWAY	hsa05014	2	53	0.403492	0.841696	PPP3CC|MAPK12	http://www.genome.jp/kegg-bin/show_pathway?hsa05014/hsa:6300%09red/hsa:5533%09red
Cell cycle	KEGG PATHWAY	hsa04110	4	124	0.40497	0.841696	YWHAZ|FZR1|SMAD2|CHEK1	http://www.genome.jp/kegg-bin/show_pathway?hsa04110/hsa:4087%09red/hsa:51343%09red/hsa:1111%09red/hsa:7534%09red
Gap junction	KEGG PATHWAY	hsa04540	3	89	0.410205	0.841696	GRB2|RAF1|PRKACB	http://www.genome.jp/kegg-bin/show_pathway?hsa04540/hsa:5567%09red/hsa:5894%09red/hsa:2885%09red
One carbon pool by folate	KEGG PATHWAY	hsa00670	1	20	0.410474	0.841696	DHFR	http://www.genome.jp/kegg-bin/show_pathway?hsa00670/hsa:1719%09red
Non-small cell lung cancer	KEGG PATHWAY	hsa05223	2	54	0.412649	0.841696	GRB2|RAF1	http://www.genome.jp/kegg-bin/show_pathway?hsa05223/hsa:2885%09red/hsa:5894%09red
Basal cell carcinoma	KEGG PATHWAY	hsa05217	2	55	0.421736	0.841696	AXIN2|TCF7L2	http://www.genome.jp/kegg-bin/show_pathway?hsa05217/hsa:6934%09red/hsa:8313%09red
Fc gamma R-mediated phagocytosis	KEGG PATHWAY	hsa04666	3	91	0.424208	0.841696	PLA2G6|LIMK2|RAF1	http://www.genome.jp/kegg-bin/show_pathway?hsa04666/hsa:5894%09red/hsa:3985%09red/hsa:8398%09red
Terpenoid backbone biosynthesis	KEGG PATHWAY	hsa00900	1	21	0.425871	0.841696	GGPS1	http://www.genome.jp/kegg-bin/show_pathway?hsa00900/hsa:9453%09red
Epstein-Barr virus infection	KEGG PATHWAY	hsa05169	6	202	0.430745	0.841696	YWHAZ|SNW1|TBP|MAPK12|PRKACB|ATF2	http://www.genome.jp/kegg-bin/show_pathway?hsa05169/hsa:22938%09red/hsa:1386%09red/hsa:7534%09red/hsa:5567%09red/hsa:6908%09red/hsa:6300%09red
Steroid hormone biosynthesis	KEGG PATHWAY	hsa00140	2	56	0.430751	0.841696	CYP3A5|CYP11A1	http://www.genome.jp/kegg-bin/show_pathway?hsa00140/hsa:1577%09red/hsa:1583%09red
Metabolic pathways	KEGG PATHWAY	hsa01100	32	1182	0.43425	0.841696	B4GALNT1|DHFR|MOCS2|EPT1|ADPGK|GGPS1|UQCRB|CYP11A1|PPT2|DCTD|PLA2G6|POLD4|LSS|MCEE|DGKA|PTS|ATP6V0B|HMGCL|MAN2A2|PLCD4|REV3L|ST6GALNAC6|CYP3A5|PAFAH1B2|TRIT1|ARSB|PLD3|ALOX12B|MOGS|GLB1|TYMP|NDST2	http://www.genome.jp/kegg-bin/show_pathway?hsa01100/hsa:8509%09red/hsa:9374%09red/hsa:84812%09red/hsa:23646%09red/hsa:8398%09red/hsa:533%09red/hsa:4047%09red/hsa:4122%09red/hsa:5805%09red/hsa:54802%09red/hsa:2720%09red/hsa:2583%09red/hsa:1635%09red/hsa:57804%09red/hsa:5980%09red/hsa:83440%09red/hsa:1583%09red/hsa:7381%09red/hsa:9453%09red/hsa:411%09red/hsa:1577%09red/hsa:242%09red/hsa:1719%09red/…
Morphine addiction	KEGG PATHWAY	hsa05032	3	93	0.438099	0.841696	PDE4C|PDE4D|PRKACB	http://www.genome.jp/kegg-bin/show_pathway?hsa05032/hsa:5144%09red/hsa:5567%09red/hsa:5143%09red
NOD-like receptor signaling pathway	KEGG PATHWAY	hsa04621	2	57	0.439692	0.841696	NOD1|MAPK12	http://www.genome.jp/kegg-bin/show_pathway?hsa04621/hsa:6300%09red/hsa:10392%09red
Focal adhesion	KEGG PATHWAY	hsa04510	6	207	0.454026	0.842949	IGF1R|COL4A5|GRB2|RAPGEF1|RAF1|PPP1R12A	http://www.genome.jp/kegg-bin/show_pathway?hsa04510/hsa:1287%09red/hsa:2889%09red/hsa:4659%09red/hsa:2885%09red/hsa:3480%09red/hsa:5894%09red
Fatty acid elongation	KEGG PATHWAY	hsa00062	1	23	0.455475	0.842949	PPT2	http://www.genome.jp/kegg-bin/show_pathway?hsa00062/hsa:9374%09red
Mismatch repair	KEGG PATHWAY	hsa03430	1	23	0.455475	0.842949	POLD4	http://www.genome.jp/kegg-bin/show_pathway?hsa03430/hsa:57804%09red
Long-term depression	KEGG PATHWAY	hsa04730	2	60	0.466046	0.842949	IGF1R|RAF1	http://www.genome.jp/kegg-bin/show_pathway?hsa04730/hsa:5894%09red/hsa:3480%09red
Vitamin digestion and absorption	KEGG PATHWAY	hsa04977	1	24	0.469703	0.842949	SLC19A1	http://www.genome.jp/kegg-bin/show_pathway?hsa04977/hsa:6573%09red
Dorso-ventral axis formation	KEGG PATHWAY	hsa04320	1	24	0.469703	0.842949	GRB2	http://www.genome.jp/kegg-bin/show_pathway?hsa04320/hsa:2885%09red
Glyoxylate and dicarboxylate metabolism	KEGG PATHWAY	hsa00630	1	24	0.469703	0.842949	MCEE	http://www.genome.jp/kegg-bin/show_pathway?hsa00630/hsa:84693%09red
Shigellosis	KEGG PATHWAY	hsa05131	2	61	0.474669	0.844323	NOD1|MAPK12	http://www.genome.jp/kegg-bin/show_pathway?hsa05131/hsa:6300%09red/hsa:10392%09red
alpha-Linolenic acid metabolism	KEGG PATHWAY	hsa00592	1	25	0.483561	0.852595	PLA2G6	http://www.genome.jp/kegg-bin/show_pathway?hsa00592/hsa:8398%09red
Transcriptional misregulation in cancer	KEGG PATHWAY	hsa05202	5	179	0.501396	0.873605	PML|IGF1R|CCNT2|ID2|MEIS1	http://www.genome.jp/kegg-bin/show_pathway?hsa05202/hsa:5371%09red/hsa:3480%09red/hsa:905%09red/hsa:4211%09red/hsa:3398%09red
Retrograde endocannabinoid signaling	KEGG PATHWAY	hsa04723	3	103	0.505442	0.873605	FAAH|MAPK12|PRKACB	http://www.genome.jp/kegg-bin/show_pathway?hsa04723/hsa:5567%09red/hsa:6300%09red/hsa:2166%09red
Nitrogen metabolism	KEGG PATHWAY	hsa00910	1	27	0.510207	0.873605	CA12	http://www.genome.jp/kegg-bin/show_pathway?hsa00910/hsa:771%09red
Pancreatic cancer	KEGG PATHWAY	hsa05212	2	66	0.516494	0.873605	RAF1|SMAD2	http://www.genome.jp/kegg-bin/show_pathway?hsa05212/hsa:4087%09red/hsa:5894%09red
Calcium signaling pathway	KEGG PATHWAY	hsa04020	5	183	0.521127	0.873605	PRKACB|PLCD4|CAMK2G|ERBB3|PPP3CC	http://www.genome.jp/kegg-bin/show_pathway?hsa04020/hsa:5567%09red/hsa:84812%09red/hsa:2065%09red/hsa:5533%09red/hsa:818%09red
Histidine metabolism	KEGG PATHWAY	hsa00340	1	28	0.523012	0.873605	HEMK1	http://www.genome.jp/kegg-bin/show_pathway?hsa00340/hsa:51409%09red
Arachidonic acid metabolism	KEGG PATHWAY	hsa00590	2	68	0.532601	0.873605	PLA2G6|ALOX12B	http://www.genome.jp/kegg-bin/show_pathway?hsa00590/hsa:242%09red/hsa:8398%09red
Butanoate metabolism	KEGG PATHWAY	hsa00650	1	29	0.535485	0.873605	HMGCL	http://www.genome.jp/kegg-bin/show_pathway?hsa00650/hsa:3155%09red
Thyroid cancer	KEGG PATHWAY	hsa05216	1	29	0.535485	0.873605	TCF7L2	http://www.genome.jp/kegg-bin/show_pathway?hsa05216/hsa:6934%09red
Complement and coagulation cascades	KEGG PATHWAY	hsa04610	2	69	0.540517	0.873605	CFD|FGA	http://www.genome.jp/kegg-bin/show_pathway?hsa04610/hsa:2243%09red/hsa:1675%09red
Galactose metabolism	KEGG PATHWAY	hsa00052	1	30	0.547633	0.873605	GLB1	http://www.genome.jp/kegg-bin/show_pathway?hsa00052/hsa:2720%09red
Other types of O-glycan biosynthesis	KEGG PATHWAY	hsa00514	1	30	0.547633	0.873605	POGLUT1	http://www.genome.jp/kegg-bin/show_pathway?hsa00514/hsa:56983%09red
Adipocytokine signaling pathway	KEGG PATHWAY	hsa04920	2	71	0.55607	0.88008	CPT1B|PRKAA2	http://www.genome.jp/kegg-bin/show_pathway?hsa04920/hsa:1375%09red/hsa:5563%09red
Thyroid hormone synthesis	KEGG PATHWAY	hsa04918	2	72	0.563707	0.88142	ATF2|PRKACB	http://www.genome.jp/kegg-bin/show_pathway?hsa04918/hsa:1386%09red/hsa:5567%09red
Propanoate metabolism	KEGG PATHWAY	hsa00640	1	32	0.57099	0.88142	MCEE	http://www.genome.jp/kegg-bin/show_pathway?hsa00640/hsa:84693%09red
Chronic myeloid leukemia	KEGG PATHWAY	hsa05220	2	73	0.57125	0.88142	GRB2|RAF1	http://www.genome.jp/kegg-bin/show_pathway?hsa05220/hsa:2885%09red/hsa:5894%09red
Serotonergic synapse	KEGG PATHWAY	hsa04726	3	114	0.574457	0.88142	RAF1|ALOX12B|PRKACB	http://www.genome.jp/kegg-bin/show_pathway?hsa04726/hsa:5567%09red/hsa:5894%09red/hsa:242%09red
Pertussis	KEGG PATHWAY	hsa05133	2	75	0.586053	0.885624	NOD1|MAPK12	http://www.genome.jp/kegg-bin/show_pathway?hsa05133/hsa:6300%09red/hsa:10392%09red
Gastric acid secretion	KEGG PATHWAY	hsa04971	2	75	0.586053	0.885624	CAMK2G|PRKACB	http://www.genome.jp/kegg-bin/show_pathway?hsa04971/hsa:5567%09red/hsa:818%09red
Regulation of autophagy	KEGG PATHWAY	hsa04140	1	34	0.593148	0.885624	PRKAA2	http://www.genome.jp/kegg-bin/show_pathway?hsa04140/hsa:5563%09red
Glutamatergic synapse	KEGG PATHWAY	hsa04724	3	118	0.598037	0.885624	PPP3CC|GRIN3B|PRKACB	http://www.genome.jp/kegg-bin/show_pathway?hsa04724/hsa:116444%09red/hsa:5567%09red/hsa:5533%09red
Prion diseases	KEGG PATHWAY	hsa05020	1	36	0.614167	0.885624	PRKACB	http://www.genome.jp/kegg-bin/show_pathway?hsa05020/hsa:5567%09red
SNARE interactions in vesicular transport	KEGG PATHWAY	hsa04130	1	36	0.614167	0.885624	VAMP4	http://www.genome.jp/kegg-bin/show_pathway?hsa04130/hsa:8674%09red
DNA replication	KEGG PATHWAY	hsa03030	1	36	0.614167	0.885624	POLD4	http://www.genome.jp/kegg-bin/show_pathway?hsa03030/hsa:57804%09red
Phosphatidylinositol signaling system	KEGG PATHWAY	hsa04070	2	81	0.62819	0.885624	PLCD4|DGKA	http://www.genome.jp/kegg-bin/show_pathway?hsa04070/hsa:1606%09red/hsa:84812%09red
Tyrosine metabolism	KEGG PATHWAY	hsa00350	1	39	0.643689	0.885624	HEMK1	http://www.genome.jp/kegg-bin/show_pathway?hsa00350/hsa:51409%09red
Purine metabolism	KEGG PATHWAY	hsa00230	4	169	0.646988	0.885624	ENTPD6|PDE4C|PDE4D|POLD4	http://www.genome.jp/kegg-bin/show_pathway?hsa00230/hsa:5144%09red/hsa:955%09red/hsa:57804%09red/hsa:5143%09red
Ribosome biogenesis in eukaryotes	KEGG PATHWAY	hsa03008	2	84	0.647985	0.885624	WDR3|CIRH1A	http://www.genome.jp/kegg-bin/show_pathway?hsa03008/hsa:10885%09red/hsa:84916%09red
Alzheimer's disease	KEGG PATHWAY	hsa05010	4	170	0.651591	0.885624	APH1A|PPP3CC|UQCRB|MAPT	http://www.genome.jp/kegg-bin/show_pathway?hsa05010/hsa:7381%09red/hsa:4137%09red/hsa:5533%09red/hsa:51107%09red
Nicotine addiction	KEGG PATHWAY	hsa05033	1	40	0.653022	0.885624	GRIN3B	http://www.genome.jp/kegg-bin/show_pathway?hsa05033/hsa:116444%09red
Regulation of actin cytoskeleton	KEGG PATHWAY	hsa04810	5	215	0.664758	0.885624	LIMK2|FGFR4|RAF1|PPP1R12A|FGFR1	http://www.genome.jp/kegg-bin/show_pathway?hsa04810/hsa:2264%09red/hsa:5894%09red/hsa:3985%09red/hsa:2260%09red/hsa:4659%09red
ECM-receptor interaction	KEGG PATHWAY	hsa04512	2	87	0.666941	0.885624	COL4A5|DAG1	http://www.genome.jp/kegg-bin/show_pathway?hsa04512/hsa:1287%09red/hsa:1605%09red
Spliceosome	KEGG PATHWAY	hsa03040	3	131	0.668638	0.885624	PRPF38B|SNW1|MAGOH	http://www.genome.jp/kegg-bin/show_pathway?hsa03040/hsa:55119%09red/hsa:4116%09red/hsa:22938%09red
Apoptosis	KEGG PATHWAY	hsa04210	2	88	0.673075	0.885624	PPP3CC|PRKACB	http://www.genome.jp/kegg-bin/show_pathway?hsa04210/hsa:5567%09red/hsa:5533%09red
Protein digestion and absorption	KEGG PATHWAY	hsa04974	2	88	0.673075	0.885624	COL4A5|KCNN4	http://www.genome.jp/kegg-bin/show_pathway?hsa04974/hsa:1287%09red/hsa:3783%09red
Hepatitis C	KEGG PATHWAY	hsa05160	3	133	0.678663	0.885624	GRB2|RAF1|MAPK12	http://www.genome.jp/kegg-bin/show_pathway?hsa05160/hsa:2885%09red/hsa:5894%09red/hsa:6300%09red
Porphyrin and chlorophyll metabolism	KEGG PATHWAY	hsa00860	1	43	0.679586	0.885624	CP	http://www.genome.jp/kegg-bin/show_pathway?hsa00860/hsa:1356%09red
Osteoclast differentiation	KEGG PATHWAY	hsa04380	3	134	0.683591	0.885624	GRB2|PPP3CC|MAPK12	http://www.genome.jp/kegg-bin/show_pathway?hsa04380/hsa:2885%09red/hsa:6300%09red/hsa:5533%09red
Tight junction	KEGG PATHWAY	hsa04530	3	134	0.683591	0.885624	EPB41L1|TJP2|TJP3	http://www.genome.jp/kegg-bin/show_pathway?hsa04530/hsa:9414%09red/hsa:2036%09red/hsa:27134%09red
Salivary secretion	KEGG PATHWAY	hsa04970	2	90	0.68507	0.885624	KCNN4|PRKACB	http://www.genome.jp/kegg-bin/show_pathway?hsa04970/hsa:5567%09red/hsa:3783%09red
Type I diabetes mellitus	KEGG PATHWAY	hsa04940	1	44	0.687983	0.885624	PTPRN	http://www.genome.jp/kegg-bin/show_pathway?hsa04940/hsa:5798%09red
Ribosome	KEGG PATHWAY	hsa03010	3	136	0.693281	0.885624	MRPL18|UBA52|RPS2	http://www.genome.jp/kegg-bin/show_pathway?hsa03010/hsa:7311%09red/hsa:29074%09red/hsa:6187%09red
Alcoholism	KEGG PATHWAY	hsa05034	4	180	0.695418	0.885624	GRB2|RAF1|GRIN3B|ATF2	http://www.genome.jp/kegg-bin/show_pathway?hsa05034/hsa:116444%09red/hsa:2885%09red/hsa:5894%09red/hsa:1386%09red
Vasopressin-regulated water reabsorption	KEGG PATHWAY	hsa04962	1	45	0.696162	0.885624	PRKACB	http://www.genome.jp/kegg-bin/show_pathway?hsa04962/hsa:5567%09red
Sphingolipid metabolism	KEGG PATHWAY	hsa00600	1	47	0.711885	0.89993	GLB1	http://www.genome.jp/kegg-bin/show_pathway?hsa00600/hsa:2720%09red
Intestinal immune network for IgA production	KEGG PATHWAY	hsa04672	1	48	0.719441	0.903798	IL15RA	http://www.genome.jp/kegg-bin/show_pathway?hsa04672/hsa:3601%09red
Circadian entrainment	KEGG PATHWAY	hsa04713	2	97	0.724248	0.904186	CAMK2G|PRKACB	http://www.genome.jp/kegg-bin/show_pathway?hsa04713/hsa:5567%09red/hsa:818%09red
Taste transduction	KEGG PATHWAY	hsa04742	1	53	0.754363	0.924995	PRKACB	http://www.genome.jp/kegg-bin/show_pathway?hsa04742/hsa:5567%09red
Chagas disease (American trypanosomiasis)	KEGG PATHWAY	hsa05142	2	105	0.76393	0.924995	SMAD2|MAPK12	http://www.genome.jp/kegg-bin/show_pathway?hsa05142/hsa:4087%09red/hsa:6300%09red
Pathogenic Escherichia coli infection	KEGG PATHWAY	hsa05130	1	55	0.76709	0.924995	YWHAZ	http://www.genome.jp/kegg-bin/show_pathway?hsa05130/hsa:7534%09red
Glycerolipid metabolism	KEGG PATHWAY	hsa00561	1	55	0.76709	0.924995	DGKA	http://www.genome.jp/kegg-bin/show_pathway?hsa00561/hsa:1606%09red
Legionellosis	KEGG PATHWAY	hsa05134	1	55	0.76709	0.924995	SAR1A	http://www.genome.jp/kegg-bin/show_pathway?hsa05134/hsa:56681%09red
HIF-1 signaling pathway	KEGG PATHWAY	hsa04066	2	106	0.768528	0.924995	IGF1R|CAMK2G	http://www.genome.jp/kegg-bin/show_pathway?hsa04066/hsa:3480%09red/hsa:818%09red
Staphylococcus aureus infection	KEGG PATHWAY	hsa05150	1	56	0.773205	0.925085	CFD	http://www.genome.jp/kegg-bin/show_pathway?hsa05150/hsa:1675%09red
Amoebiasis	KEGG PATHWAY	hsa05146	2	109	0.78186	0.928998	COL4A5|PRKACB	http://www.genome.jp/kegg-bin/show_pathway?hsa05146/hsa:1287%09red/hsa:5567%09red
TNF signaling pathway	KEGG PATHWAY	hsa04668	2	110	0.786153	0.928998	MAPK12|ATF2	http://www.genome.jp/kegg-bin/show_pathway?hsa04668/hsa:1386%09red/hsa:6300%09red
MicroRNAs in cancer	KEGG PATHWAY	hsa05206	6	296	0.790342	0.928998	ERBB3|FOXP1|TPM1|GRB2|CDCA5|RAF1	http://www.genome.jp/kegg-bin/show_pathway?hsa05206/hsa:27086%09red/hsa:2885%09red/hsa:2065%09red/hsa:113130%09red/hsa:7168%09red/hsa:5894%09red
Cholinergic synapse	KEGG PATHWAY	hsa04725	2	113	0.798591	0.931185	CAMK2G|PRKACB	http://www.genome.jp/kegg-bin/show_pathway?hsa04725/hsa:5567%09red/hsa:818%09red
Inositol phosphate metabolism	KEGG PATHWAY	hsa00562	1	61	0.801468	0.931185	PLCD4	http://www.genome.jp/kegg-bin/show_pathway?hsa00562/hsa:84812%09red
Synaptic vesicle cycle	KEGG PATHWAY	hsa04721	1	63	0.811766	0.932372	ATP6V0B	http://www.genome.jp/kegg-bin/show_pathway?hsa04721/hsa:533%09red
Aminoacyl-tRNA biosynthesis	KEGG PATHWAY	hsa00970	1	63	0.811766	0.932372	AARS2	http://www.genome.jp/kegg-bin/show_pathway?hsa00970/hsa:57505%09red
Glycolysis / Gluconeogenesis	KEGG PATHWAY	hsa00010	1	66	0.826226	0.936185	ADPGK	http://www.genome.jp/kegg-bin/show_pathway?hsa00010/hsa:83440%09red
Inflammatory bowel disease (IBD)	KEGG PATHWAY	hsa05321	1	66	0.826226	0.936185	SMAD2	http://www.genome.jp/kegg-bin/show_pathway?hsa05321/hsa:4087%09red
Retinol metabolism	KEGG PATHWAY	hsa00830	1	68	0.835247	0.936185	CYP3A5	http://www.genome.jp/kegg-bin/show_pathway?hsa00830/hsa:1577%09red
p53 signaling pathway	KEGG PATHWAY	hsa04115	1	68	0.835247	0.936185	CHEK1	http://www.genome.jp/kegg-bin/show_pathway?hsa04115/hsa:1111%09red
PPAR signaling pathway	KEGG PATHWAY	hsa03320	1	71	0.847913	0.936185	CPT1B	http://www.genome.jp/kegg-bin/show_pathway?hsa03320/hsa:1375%09red
Viral myocarditis	KEGG PATHWAY	hsa05416	1	71	0.847913	0.936185	DAG1	http://www.genome.jp/kegg-bin/show_pathway?hsa05416/hsa:1605%09red
Bile secretion	KEGG PATHWAY	hsa04976	1	72	0.851916	0.936185	PRKACB	http://www.genome.jp/kegg-bin/show_pathway?hsa04976/hsa:5567%09red
Leishmaniasis	KEGG PATHWAY	hsa05140	1	73	0.855814	0.936185	MAPK12	http://www.genome.jp/kegg-bin/show_pathway?hsa05140/hsa:6300%09red
Huntington's disease	KEGG PATHWAY	hsa05016	3	183	0.861297	0.936185	TBP|DNAH1|UQCRB	http://www.genome.jp/kegg-bin/show_pathway?hsa05016/hsa:6908%09red/hsa:25981%09red/hsa:7381%09red
Herpes simplex infection	KEGG PATHWAY	hsa05168	3	185	0.866214	0.936185	PML|TBP|EEF1D	http://www.genome.jp/kegg-bin/show_pathway?hsa05168/hsa:6908%09red/hsa:5371%09red/hsa:1936%09red
Oxidative phosphorylation	KEGG PATHWAY	hsa00190	2	133	0.866321	0.936185	ATP6V0B|UQCRB	http://www.genome.jp/kegg-bin/show_pathway?hsa00190/hsa:7381%09red/hsa:533%09red
Chemokine signaling pathway	KEGG PATHWAY	hsa04062	3	189	0.875591	0.941143	GRB2|RAF1|PRKACB	http://www.genome.jp/kegg-bin/show_pathway?hsa04062/hsa:5567%09red/hsa:5894%09red/hsa:2885%09red
Small cell lung cancer	KEGG PATHWAY	hsa05222	1	86	0.898106	0.956004	COL4A5	http://www.genome.jp/kegg-bin/show_pathway?hsa05222/hsa:1287%09red
Salmonella infection	KEGG PATHWAY	hsa05132	1	87	0.900794	0.956004	MAPK12	http://www.genome.jp/kegg-bin/show_pathway?hsa05132/hsa:6300%09red
GABAergic synapse	KEGG PATHWAY	hsa04727	1	90	0.908442	0.956004	PRKACB	http://www.genome.jp/kegg-bin/show_pathway?hsa04727/hsa:5567%09red
Rheumatoid arthritis	KEGG PATHWAY	hsa05323	1	90	0.908442	0.956004	ATP6V0B	http://www.genome.jp/kegg-bin/show_pathway?hsa05323/hsa:533%09red
Carbon metabolism	KEGG PATHWAY	hsa01200	1	92	0.913212	0.956019	MCEE	http://www.genome.jp/kegg-bin/show_pathway?hsa01200/hsa:84693%09red
Jak-STAT signaling pathway	KEGG PATHWAY	hsa04630	2	157	0.919893	0.958023	GRB2|IL15RA	http://www.genome.jp/kegg-bin/show_pathway?hsa04630/hsa:3601%09red/hsa:2885%09red
Toll-like receptor signaling pathway	KEGG PATHWAY	hsa04620	1	107	0.94193	0.975917	MAPK12	http://www.genome.jp/kegg-bin/show_pathway?hsa04620/hsa:6300%09red
Leukocyte transendothelial migration	KEGG PATHWAY	hsa04670	1	118	0.956776	0.982359	MAPK12	http://www.genome.jp/kegg-bin/show_pathway?hsa04670/hsa:6300%09red
Toxoplasmosis	KEGG PATHWAY	hsa05145	1	119	0.957922	0.982359	MAPK12	http://www.genome.jp/kegg-bin/show_pathway?hsa05145/hsa:6300%09red
Parkinson's disease	KEGG PATHWAY	hsa05012	1	131	0.969529	0.987143	UQCRB	http://www.genome.jp/kegg-bin/show_pathway?hsa05012/hsa:7381%09red
Cytokine-cytokine receptor interaction	KEGG PATHWAY	hsa04060	3	266	0.97241	0.987143	ACVR2A|IL15RA|TNFRSF6B	http://www.genome.jp/kegg-bin/show_pathway?hsa04060/hsa:3601%09red/hsa:92%09red/hsa:8771%09red
Phagosome	KEGG PATHWAY	hsa04145	1	154	0.983612	0.993498	ATP6V0B	http://www.genome.jp/kegg-bin/show_pathway?hsa04145/hsa:533%09red
Neuroactive ligand-receptor interaction	KEGG PATHWAY	hsa04080	2	275	0.994756	0.99973	PTH1R|GRIN3B	http://www.genome.jp/kegg-bin/show_pathway?hsa04080/hsa:116444%09red/hsa:5745%09red
Olfactory transduction	KEGG PATHWAY	hsa04740	2	406	0.999802	0.999802	CAMK2G|PRKACB	http://www.genome.jp/kegg-bin/show_pathway?hsa04740/hsa:5567%09red/hsa:818%09red
